# Supplementary material for: Oxygen evolving reactions catalysed by synthetic manganese complexes: A systematic screening
Source: Royal Society of Chemistry journal article supplement (doi:10.1039/b710761g), 2007-01-01
Supplement: b710761g.pdf [file b710761g.pdf]

## **Oxygen Evolving Reactions Catalysed by Synthetic Manganese Complexes: A Systematic Screening**

**Philipp Kurz, Gustav Berggren, Magnus F. Anderlund and Stenbjörn Styring\***

Department of Photochemistry and Molecular Science, Ångströmlaboratory, Uppsala University, Box 523, S-75120 Uppsala (Sweden).

### **Supporting Information**

**Table S1.** Selected properties of transition metal complexes.

**Table S2.** Selected properties of oxidation agents used.

**Table S1.** Selected properties of the studied metal complexes.

|   | metal centres | oxidation states | ligands bridging metals                              | echem: at least one reversible oxidation | O <sub>2</sub> evolution reported |
|---|---------------|------------------|------------------------------------------------------|------------------------------------------|-----------------------------------|
| 1 | 2 x Mn        | II, II           | Φ-O <sup>-</sup> , AcO <sup>-</sup>                  | yes                                      | no                                |
| 2 | 2 x Mn        | II, III          | Φ-O <sup>-</sup> , AcO <sup>-</sup>                  | yes                                      | no                                |
| 3 | 2 x Mn        | III, III         | Φ-O <sup>-</sup> , AcO <sup>-</sup>                  | no                                       | no                                |
| 4 | 4 x Mn        | II,III,IV,II     | R-O <sup>-</sup> , O <sup>2-</sup> , OH <sup>-</sup> | no                                       | no                                |
| 5 | 2 x Mn        | II, II           | R-COO <sup>-</sup>                                   | no                                       | yes                               |
| 6 | 2 x Mn        | III, IV          | O <sup>2-</sup>                                      | no                                       | yes                               |
| 7 | 2 x Ru        | III, III         | O <sup>2-</sup>                                      | yes                                      | yes                               |

abbreviations: Φ-O<sup>-</sup>: phenolate, AcO<sup>-</sup>: acetate

**Table S2.** Selected properties of oxidation agents used.

|                                                            | H <sub>2</sub> O <sub>2</sub> | TBHP   | HSO <sub>5</sub> <sup>-</sup> | ClO <sup>-</sup>                  | Ce <sup>4+</sup>             | Ru <sub>photo</sub>                                            |
|------------------------------------------------------------|-------------------------------|--------|-------------------------------|-----------------------------------|------------------------------|----------------------------------------------------------------|
| approx. oxidation potential vs. NHE [V]                    | + 0.9                         | + 0.7  | ?                             | + 0.4 <i>or</i> + 0.6             | + 1.5                        | + 1.5                                                          |
| electrons transferred per oxidant                          | 0 <i>or</i> 2                 | 2      | 2                             | 1 <i>or</i> 2                     | 1                            | 1                                                              |
| potential oxygen transfer agent                            | yes                           | yes    | yes                           | yes                               | no                           | no                                                             |
| peroxo-oxygen(-I)                                          | yes                           | yes    | yes                           | no                                | no                           | no                                                             |
| pH of reagent                                              | ~7                            | ~7     | ~2                            | ~9                                | ~2                           | ~4                                                             |
| other potentially reactive species in the reaction mixture | no                            | no     | no                            | Cl <sub>2</sub> , Cl <sup>-</sup> | NO <sub>3</sub> <sup>-</sup> | Cl <sup>•</sup> , Cl <sup>-</sup> , Co <sup>II</sup> complexes |
| reaction stoichiometry used                                | 2 eq.                         | 50 eq. | 50 eq.                        | 50 eq.                            | 50 eq.                       | 0.5 eq.                                                        |
